# Supplementary material for: Assessing Lead Time of Selected Ovarian Cancer Biomarkers: A Nested Case–Control Study
Source: PubMed Central journal article supplement — J Natl Cancer Inst. 2010 Jan 6;102(1):26–38. doi: 10.1093/jnci/djp438 (PMC2802285; doi:10.1093/jnci/djp438), 2010-01-06
Supplement: djp438_1.pdf [file djp438_1.pdf]

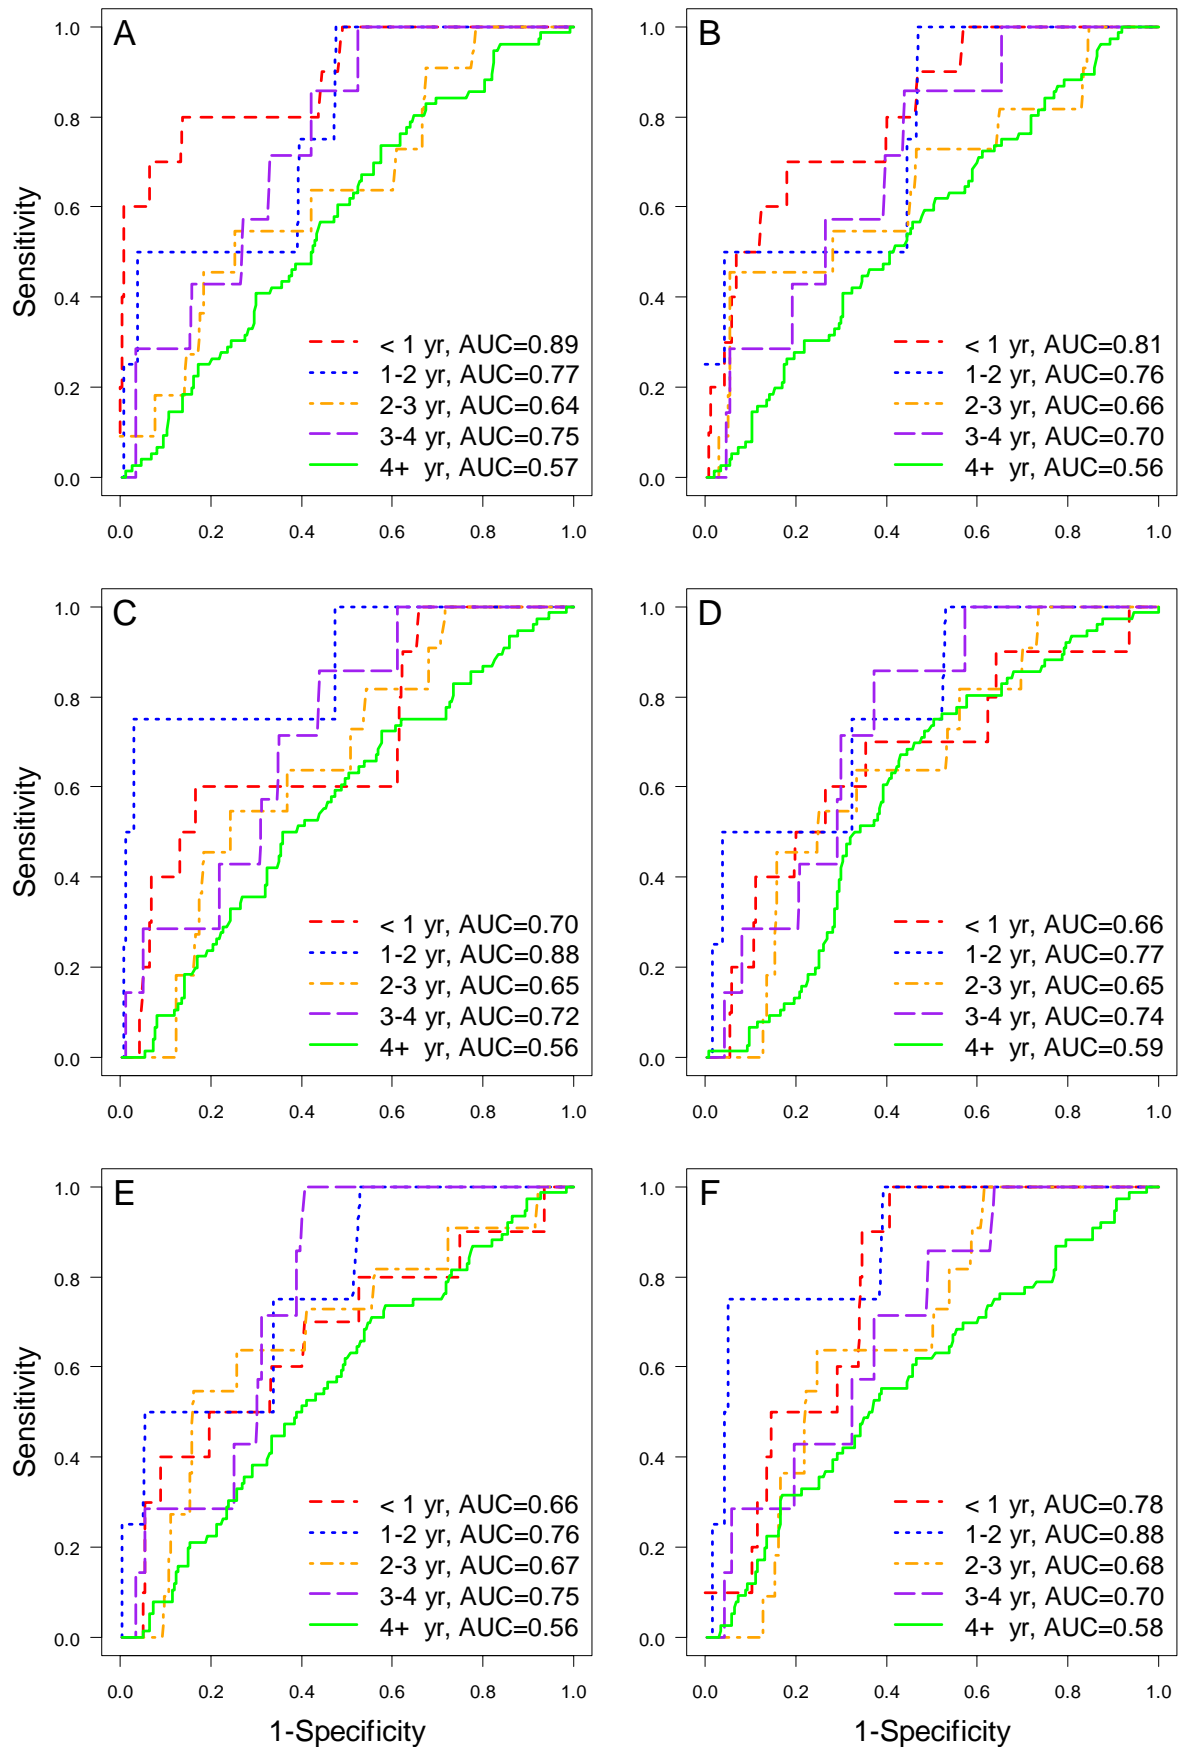

**Supplementary Figure 1.** Receiver operating characteristics curves by time before diagnosis. **A)** CA125. **B)** Human epididymis protein 4 (HE4). **C)** Mesothelin. **D)** B7-H4. **E)** Decoy receptor 3 (Dcr3). **F)** Spondin-2. AUC = area under the curve.
