# Supplementary material for: Assessing Lead Time of Selected Ovarian Cancer Biomarkers: A Nested Case–Control Study
Source: PubMed Central journal article supplement — J Natl Cancer Inst. 2010 Jan 6;102(1):26–38. doi: 10.1093/jnci/djp438 (PMC2802285; doi:10.1093/jnci/djp438), 2010-01-06
Supplement: djp438_2.pdf [file djp438_2.pdf]

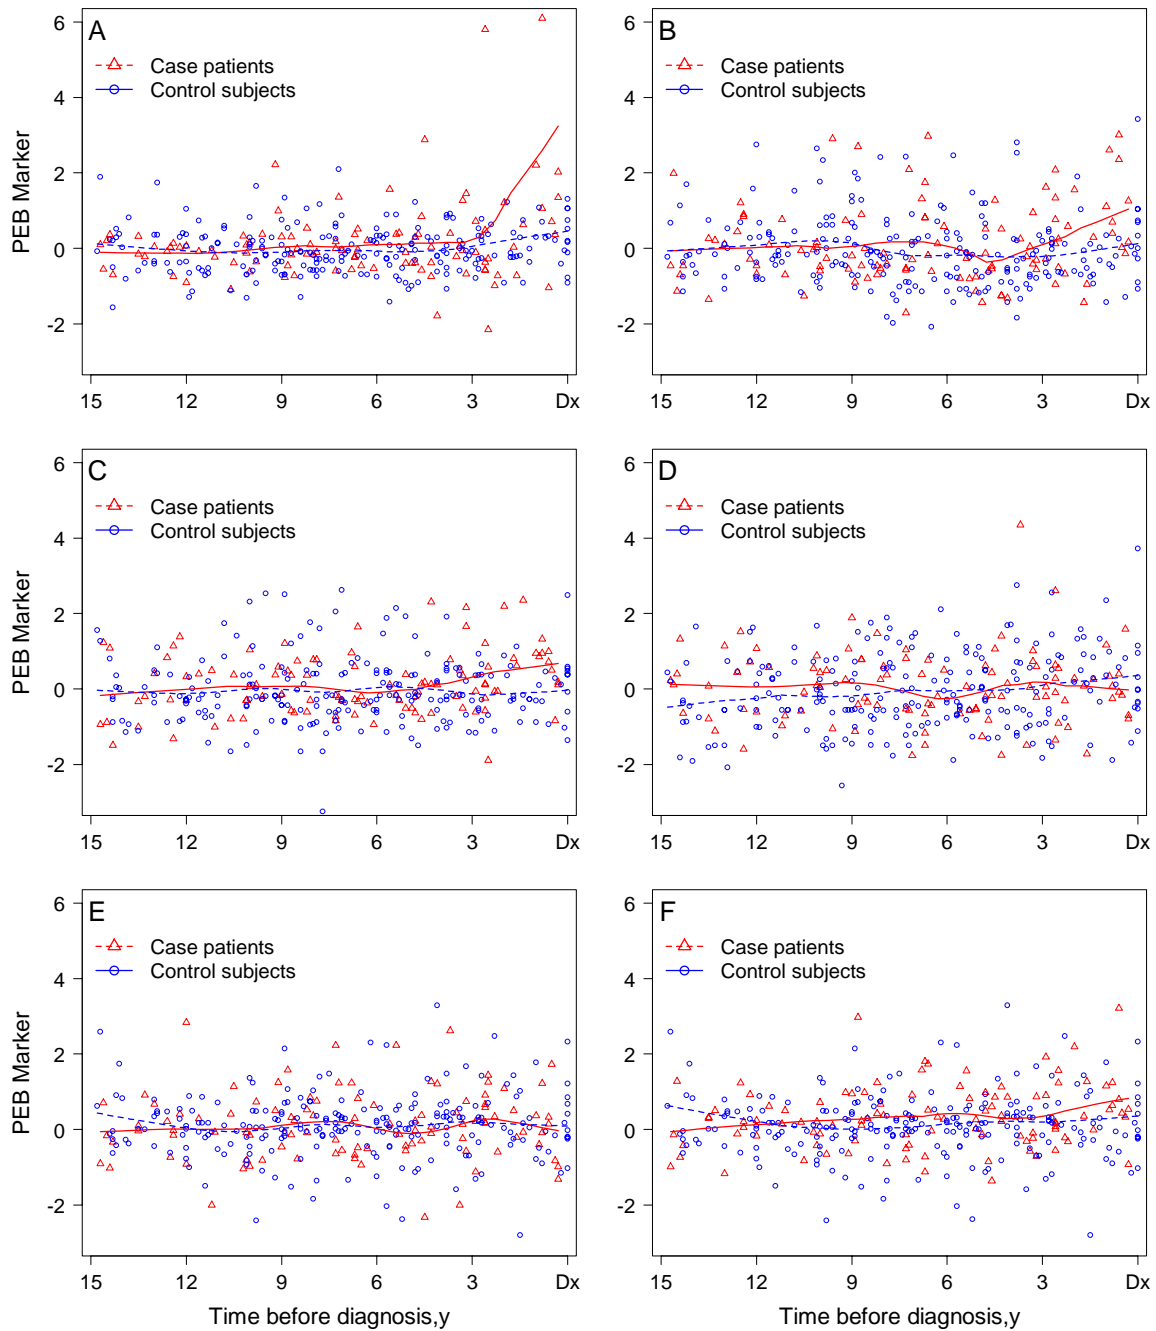

**Supplementary Figure 2.** Lowess curves of parametric empirical Bayes (PEB) marker levels by time before diagnosis or reference date. Standardized levels were rescaled to have a mean of 0 and a standard deviation of 1 among control subjects. **A)** CA125. Three cancer patients and one control subject had CA125 PEB estimates that were greater than 6 and were excluded from this analysis. **B)** Human epididymis protein 4 (HE4). **C)** Mesothelin. Two control subjects had mesothelin PEB estimates that were less than  $-3$  and were excluded from this graph. **D)** B7-H4. **E)** Decoy receptor 3 (DcR3). One cancer patient had a DcR3 PEB estimate that was less than  $-3$  and was excluded from this graph. **F)** Spondin-2.
