# Supplementary material for: Assessing Lead Time of Selected Ovarian Cancer Biomarkers: A Nested Case–Control Study
Source: PubMed Central journal article supplement — J Natl Cancer Inst. 2010 Jan 6;102(1):26–38. doi: 10.1093/jnci/djp438 (PMC2802285; doi:10.1093/jnci/djp438), 2010-01-06
Supplement: djp438_3.pdf [file djp438_3.pdf]

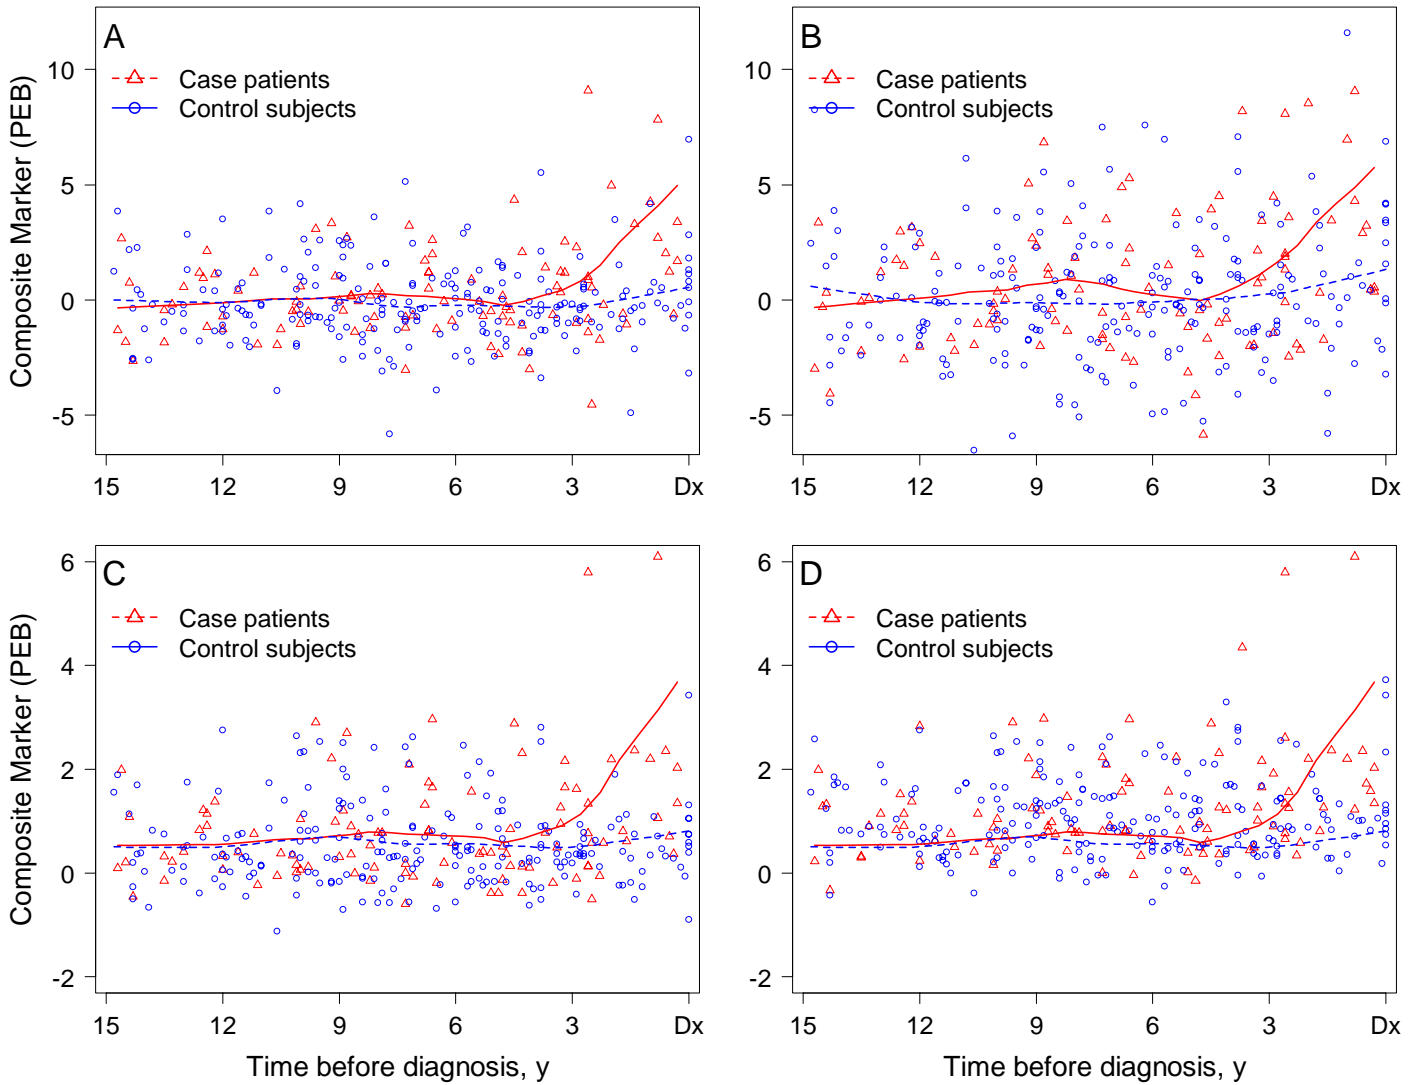

**Supplementary Figure 3.** Parametric empirical Bayes (PEB) marker levels by time before diagnosis or reference date. **A)** Composite marker 1 (defined for each observation on each woman as the sum of her CA125, human epididymis protein 4 [HE4], and mesothelin levels). **B)** Composite marker 2 (similarly defined as the sum of all markers). Two cancer patients had values for composite markers 1 and 2 that were greater than 12 and were excluded from the graphs in **A** and **B**. **C)** Composite marker 3 (defined for each observation on each woman as the maximum of her CA125, HE4, and mesothelin levels). **D)** Composite marker 4 (similarly defined as the maximum of all markers). Three cancer patients and one control subject had values for composite markers 3 and 4 that were greater than 6 and so were excluded from the graphs in **C** and **D**.
