# Supplementary material for: Assessing Lead Time of Selected Ovarian Cancer Biomarkers: A Nested Case–Control Study
Source: PubMed Central journal article supplement — J Natl Cancer Inst. 2010 Jan 6;102(1):26–38. doi: 10.1093/jnci/djp438 (PMC2802285; doi:10.1093/jnci/djp438), 2010-01-06
Supplement: djp438_5.pdf [file djp438_5.pdf]

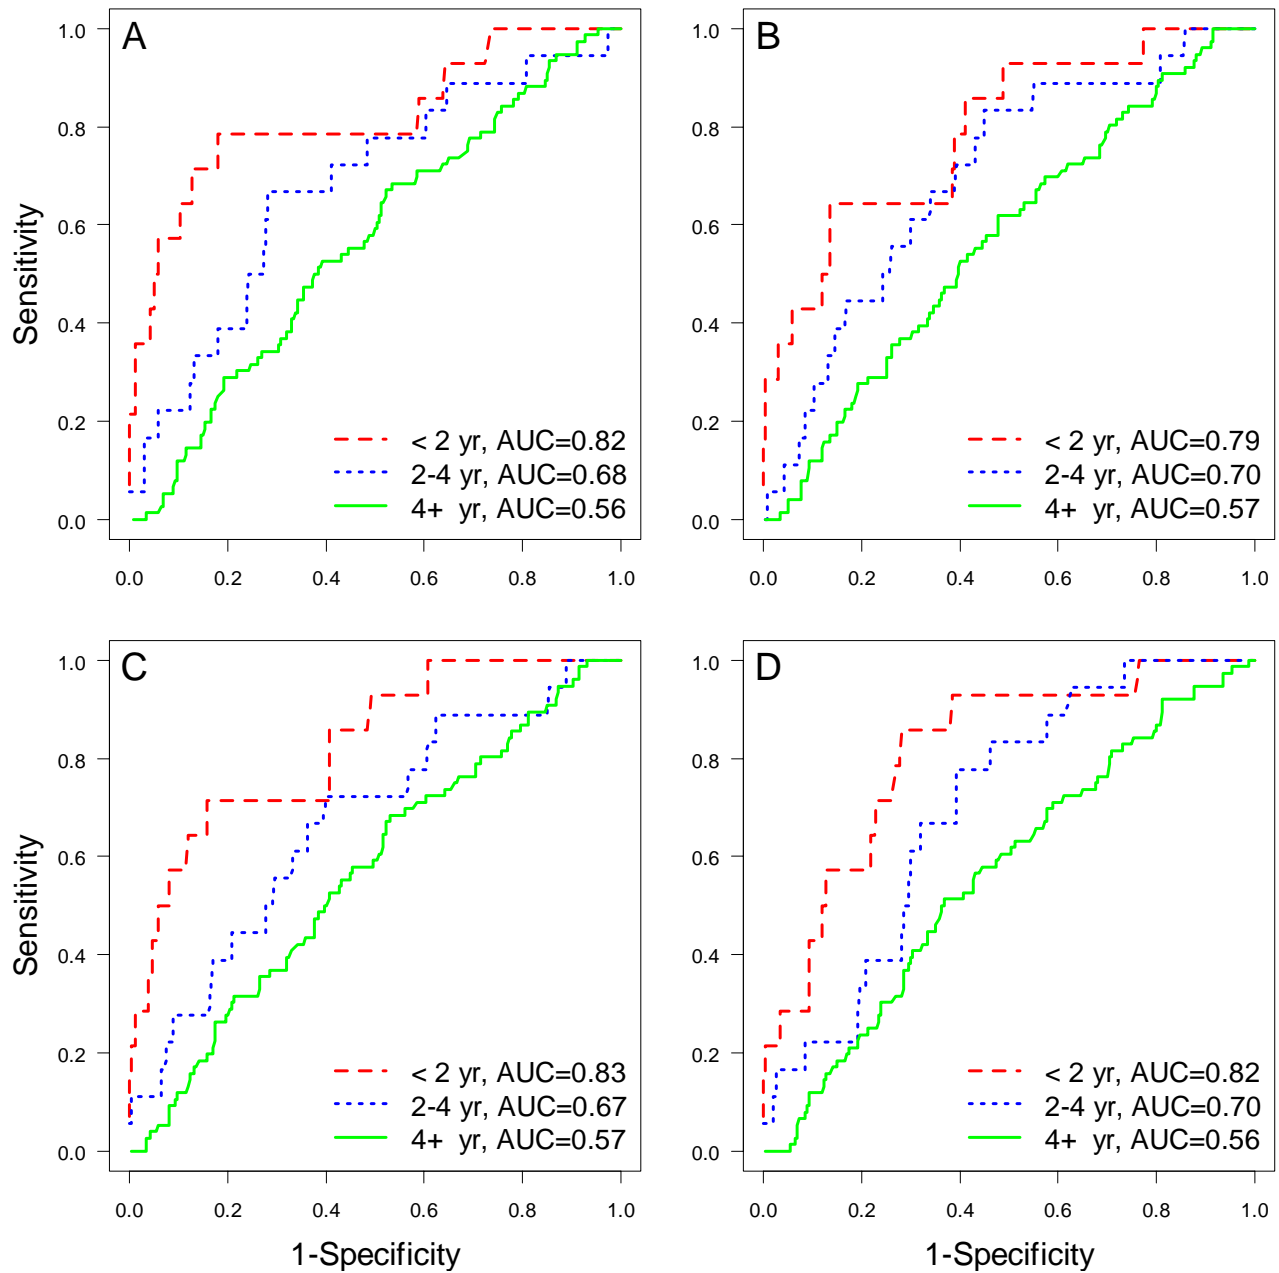

**Supplementary Figure 5.** Receiver operating characteristics curves by time before diagnosis. Standardize parametric empirical Bayes (PEB) marker levels were used. **A)** Composite marker 1 (defined for each observation on each woman as the sum of her CA125, human epididymis protein 4 [HE4], and mesothelin levels). **B)** Composite marker 2 (similarly defined as the sum of all markers). **C)** Composite marker 3 (defined for each observation on each woman as the maximum of her CA125, HE4, and mesothelin levels). **D)** Composite marker 4 (similarly defined as the maximum of all markers).
