# Supplementary material for: Assessing Lead Time of Selected Ovarian Cancer Biomarkers: A Nested Case–Control Study
Source: PubMed Central journal article supplement — J Natl Cancer Inst. 2010 Jan 6;102(1):26–38. doi: 10.1093/jnci/djp438 (PMC2802285; doi:10.1093/jnci/djp438), 2010-01-06
Supplement: djp438_6.pdf [file djp438_6.pdf]

**Supplementary Table 1.** Pearson correlation coefficients (*P* values) between standardized biomarkers (CA125, HE4, mesothelin, B7-H4, DcR3, and spondin-2) assessed at baseline\*

| Biomarker                            | Pearson correlation coefficients ( <i>P</i> values) |               |              |               |                |           |
|--------------------------------------|-----------------------------------------------------|---------------|--------------|---------------|----------------|-----------|
|                                      | Ca125                                               | HE4           | Mesothelin   | B7-H4         | DcR3           | Spondin-2 |
| <b>All control subjects (n = 70)</b> |                                                     |               |              |               |                |           |
| CA125                                | 1.00                                                |               |              |               |                |           |
| HE4                                  | -.08<br>(.49)                                       | 1.00          |              |               |                |           |
| Mesothelin                           | -.08<br>(.51)                                       | .20<br>(.10)  | 1.00         |               |                |           |
| B7-H4                                | .20<br>(.10)                                        | -.17<br>(.38) | .14<br>(.25) | 1.00          |                |           |
| DcR3                                 | .14<br>(.26)                                        | -.06<br>(.63) | .25<br>(.04) | .30<br>(.04)  | 1.00           |           |
| Spondin 2                            | .37<br>(.002)                                       | .18<br>(.15)  | .01<br>(.93) | .41<br>(.003) | .44<br>(<.001) | 1.00      |
| <b>All cancer patients (n = 34)</b>  |                                                     |               |              |               |                |           |
| CA125                                | 1.00                                                |               |              |               |                |           |
| HE4                                  | .04<br>(.82)                                        | 1.00          |              |               |                |           |
| Mesothelin                           | .26<br>(.14)                                        | .07<br>(.68)  | 1.00         |               |                |           |
| B7-H4                                | .16<br>(.36)                                        | -.05<br>(.77) | .29<br>(.10) | 1.00          |                |           |
| DcR3                                 | -.10<br>(.59)                                       | .24<br>(.17)  | .14<br>(.42) | .08<br>(.66)  | 1.00           |           |
| Spondin-2                            | .23<br>(.19)                                        | .25<br>(.16)  | .26<br>(.14) | .40<br>(.02)  | .59<br>(<.001) | 1.00      |

\**P* values are based on *t* tests. All statistical tests were two-sided. HE4 = human epididymis protein 4; DcR3 = decoy receptor 3.
